# Supplementary material for: Therapeutic implications of transcriptomics in head and neck cancer patient-derived xenografts
Source: PubMed Central journal article supplement (PMC9977000; doi:10.1371/journal.pone.0282177), 2023-03-01
Supplement: pone.0282177.s001.pdf [file pone.0282177.s001.pdf]

| PDX    | Sample-level correlation (r) |
|--------|------------------------------|
| PDX 52 | 0.99975                      |
| PDX 24 | 0.99923                      |
| PDX 9  | 0.99903                      |
| PDX 55 | 0.99882                      |
| PDX 28 | 0.99841                      |
| PDX 35 | 0.9984                       |
| PDX 10 | 0.99832                      |
| PDX 50 | 0.99831                      |
| PDX 16 | 0.99823                      |
| PDX 27 | 0.99812                      |
| PDX 41 | 0.99806                      |
| PDX 42 | 0.998                        |
| PDX 34 | 0.99799                      |
| PDX 56 | 0.99796                      |
| PDX 59 | 0.99796                      |
| PDX 7  | 0.99795                      |
| PDX 26 | 0.99793                      |
| PDX 40 | 0.99791                      |
| PDX 25 | 0.99775                      |
| PDX 58 | 0.99774                      |
| PDX 3  | 0.99758                      |
| PDX 51 | 0.99753                      |
| PDX 65 | 0.99753                      |
| PDX 49 | 0.99749                      |
| PDX 66 | 0.99749                      |
| PDX 1  | 0.99747                      |
| PDX 57 | 0.99747                      |
| PDX 48 | 0.99746                      |
| PDX 54 | 0.9974                       |
| PDX 60 | 0.9974                       |
| PDX 39 | 0.99738                      |
| PDX 64 | 0.99734                      |
| PDX 29 | 0.99728                      |
| PDX 21 | 0.99724                      |
| PDX 45 | 0.99719                      |
| PDX 19 | 0.99711                      |
| PDX 44 | 0.99701                      |
| PDX 18 | 0.99699                      |
| PDX 23 | 0.99685                      |
| PDX 33 | 0.99682                      |
| PDX 46 | 0.99668                      |
| PDX 2  | 0.99646                      |
| PDX 63 | 0.99642                      |
| PDX 4  | 0.99641                      |
| PDX 62 | 0.99637                      |
| PDX 8  | 0.99631                      |
| PDX 38 | 0.99629                      |
| PDX 20 | 0.99624                      |
| PDX 11 | 0.99603                      |
| PDX 22 | 0.99603                      |
| PDX 43 | 0.99586                      |
| PDX 32 | 0.99583                      |
| PDX 53 | 0.99568                      |
| PDX 31 | 0.99566                      |
| PDX 6  | 0.99566                      |
| PDX 15 | 0.99554                      |
| PDX 12 | 0.9955                       |
| PDX 37 | 0.99528                      |
| PDX 5  | 0.99524                      |
| PDX 36 | 0.99512                      |
| PDX 13 | 0.99487                      |
| PDX 30 | 0.99484                      |
| PDX 17 | 0.99482                      |
| PDX 47 | 0.99453                      |

**Supplemental Table 1. Sample-level correlation between unfiltered and filtered RNA-Seq datasets.**

List of r values for correlation comparisons of expression of the top 2,000 most variable genes for each PDX in the unfiltered RNA-Seq dataset (mouse and human mRNA reads) versus the filtered RNA-Seq dataset (only human reads).
