# Supplementary material for: Therapeutic implications of transcriptomics in head and neck cancer patient-derived xenografts
Source: PubMed Central journal article supplement (PMC9977000; doi:10.1371/journal.pone.0282177), 2023-03-01
Supplement: pone.0282177.s002.pdf [file pone.0282177.s002.pdf]

| Ensembl ID      | Gene Symbol            | Gene-level correlation (r) |
|-----------------|------------------------|----------------------------|
| ENSG00000165194 | <i>PCDH19</i>          | 0.98997                    |
| ENSG00000125378 | <i>BMP4</i>            | 0.98989                    |
| ENSG00000133083 | <i>DCLK1</i>           | 0.98956                    |
| ENSG00000198794 | <i>SCAMP5</i>          | 0.98928                    |
| ENSG00000171766 | <i>GATM</i>            | 0.98911                    |
| ENSG00000184588 | <i>PDE4B</i>           | 0.98907                    |
| ENSG00000179148 | <i>ALOXE3</i>          | 0.98882                    |
| ENSG00000104177 | <i>MYEF2</i>           | 0.98876                    |
| ENSG00000182568 | <i>SATB1</i>           | 0.98855                    |
| ENSG00000172020 | <i>GAP43</i>           | 0.98839                    |
| ENSG00000162878 | <i>PKDCC</i>           | 0.98837                    |
| ENSG00000066382 | <i>MPPED2</i>          | 0.988                      |
| ENSG00000260027 | <i>HOXB7</i>           | 0.98768                    |
| ENSG00000169122 | <i>FAM110B</i>         | 0.98767                    |
| ENSG00000175567 | <i>UCP2</i>            | 0.98764                    |
| ENSG00000104723 | <i>TUSC3</i>           | 0.98743                    |
| ENSG00000206538 | <i>VGLL3</i>           | 0.98738                    |
| ENSG00000101333 | <i>PLCB4</i>           | 0.98713                    |
| ENSG00000198542 | <i>ITGBL1</i>          | 0.9868                     |
| ENSG00000122592 | <i>HOXA7</i>           | 0.98659                    |
| ENSG00000168916 | <i>ZNF608</i>          | 0.98658                    |
| ENSG00000135097 | <i>MSI1</i>            | 0.98637                    |
| ENSG00000154822 | <i>PLCL2</i>           | 0.98634                    |
| ENSG00000156298 | <i>TSPAN7</i>          | 0.98562                    |
| ENSG00000172915 | <i>NBEA</i>            | 0.98551                    |
| ENSG00000187627 | <i>RGPD1</i>           | 0.98536                    |
| ENSG00000132170 | <i>PPARG</i>           | 0.98471                    |
| ENSG00000168542 | <i>COL3A1</i>          | 0.98454                    |
| ENSG00000170837 | <i>GPR27</i>           | 0.98438                    |
| ENSG00000259952 | -                      | 0.98431                    |
| ENSG00000197106 | <i>SLC6A17</i>         | 0.984                      |
| ENSG00000155849 | <i>ELMO1</i>           | 0.98361                    |
| ENSG00000170153 | <i>RNF150</i>          | 0.9836                     |
| ENSG00000077063 | <i>CTTNBP2</i>         | 0.98308                    |
| ENSG00000170689 | <i>HOXB9</i>           | 0.98205                    |
| ENSG00000077782 | <i>FGFR1</i>           | 0.9805                     |
| ENSG00000122756 | <i>CNTFR</i>           | 0.97959                    |
| ENSG00000164692 | <i>COL1A2</i>          | 0.97893                    |
| ENSG00000133134 | <i>BEX2</i>            | 0.97841                    |
| ENSG00000135363 | <i>LMO2</i>            | 0.97741                    |
| ENSG00000129682 | <i>FGF13</i>           | 0.97732                    |
| ENSG00000183091 | <i>NEB</i>             | 0.97718                    |
| ENSG00000085276 | <i>MECOM</i>           | 0.97691                    |
| ENSG00000171004 | <i>HS6ST2</i>          | 0.97645                    |
| ENSG00000198947 | <i>DMD</i>             | 0.97614                    |
| ENSG00000182985 | <i>CADM1</i>           | 0.97419                    |
| ENSG00000140092 | <i>FBLN5</i>           | 0.97088                    |
| ENSG00000184304 | <i>PRKD1</i>           | 0.97023                    |
| ENSG00000049192 | <i>ADAMTS6</i>         | 0.97014                    |
| ENSG00000168386 | <i>FILIP1L</i>         | 0.96919                    |
| ENSG00000124785 | <i>NRN1</i>            | 0.96884                    |
| ENSG00000185811 | <i>IKZF1</i>           | 0.96478                    |
| ENSG00000180818 | <i>HOXC10</i>          | 0.96396                    |
| ENSG00000114405 | <i>C3orf14</i>         | 0.96256                    |
| ENSG00000091656 | <i>ZFHX4</i>           | 0.96242                    |
| ENSG00000147257 | <i>GPC3</i>            | 0.9624                     |
| ENSG00000022267 | <i>FHL1</i>            | 0.96237                    |
| ENSG00000104332 | <i>SFRP1</i>           | 0.96037                    |
| ENSG00000124208 | <i>TMEM189-UBE2V1</i>  | 0.95993                    |
| ENSG00000117707 | <i>PROX1</i>           | 0.95817                    |
| ENSG00000006468 | <i>ETV1</i>            | 0.95196                    |
| ENSG00000154864 | <i>PIEZO2</i>          | 0.95164                    |
| ENSG00000108001 | <i>EBF3</i>            | 0.95029                    |
| ENSG00000123338 | <i>NCKAP1L</i>         | 0.94684                    |
| ENSG00000113140 | <i>SPARC</i>           | 0.94271                    |
| ENSG00000151702 | <i>FLI1</i>            | 0.94066                    |
| ENSG00000214575 | <i>CPEB1</i>           | 0.93847                    |
| ENSG00000163017 | <i>ACTG2</i>           | 0.93732                    |
| ENSG00000140937 | <i>CDH11</i>           | 0.93177                    |
| ENSG00000196604 | <i>POTEF</i>           | 0.90389                    |
| ENSG00000048740 | <i>CELF2</i>           | 0.89724                    |
| ENSG00000233608 | <i>TWIST2</i>          | 0.871                      |
| ENSG00000116132 | <i>PRRX1</i>           | 0.82153                    |
| ENSG00000269955 | <i>C7orf55-LUC7L2</i>  | 0.81838                    |
| ENSG00000254870 | <i>ATP6V1G2-DDX39B</i> | 0.80955                    |
| ENSG00000258017 | -                      | 0.47602                    |

**Supplemental Table 2. Gene-level correlation between unfiltered and filtered RNA-Seq datasets.**

List of r values for the 3.8% of transcripts (76/2000) with  $r < 0.99$  at the gene-level. Correlations are comparing expression level of each of the top 2,000 most variable genes across the PDXs before and after filtering for mouse reads.
