# Supplementary material for: Therapeutic implications of transcriptomics in head and neck cancer patient-derived xenografts
Source: PubMed Central journal article supplement (PMC9977000; doi:10.1371/journal.pone.0282177), 2023-03-01
Supplement: pone.0282177.s003.pdf [file pone.0282177.s003.pdf]

| categoryld | description                 | pValue   | qValue | geneld                                                                                                                                                                                                        | count |
|------------|-----------------------------|----------|--------|---------------------------------------------------------------------------------------------------------------------------------------------------------------------------------------------------------------|-------|
| GO:0001501 | skeletal system development | 1.40E-05 | 0.019  | <i>PKDCC</i><br><i>PRRX1</i><br><i>HOXA7</i><br><i>FGFR1</i><br><i>HOXC10</i><br><i>HOXB9</i><br><i>BMP4</i><br><i>HOXB7</i><br><i>CDH11</i><br><i>COL3A1</i><br><i>COL1A2</i><br><i>SFRP1</i><br><i>FLI1</i> | 13    |

**Supplemental Table 3. Biological process pathway analysis of transcripts with lower gene-level correlation between unfiltered and filtered RNA-Seq datasets.**

Gene Ontology (GO) annotated pathway analysis to assess for common biological functions between the 76 genes with gene-level correlation  $r$  values  $<0.99$ . Skeletal system development was the only GO term with  $q$ -value  $<0.5$ .
