# Supplementary material for: Therapeutic implications of transcriptomics in head and neck cancer patient-derived xenografts
Source: PubMed Central journal article supplement (PMC9977000; doi:10.1371/journal.pone.0282177), 2023-03-01
Supplement: pone.0282177.s004.pdf [file pone.0282177.s004.pdf]

|                 |                   | <b>P-value of association</b> |                   |                   |
|-----------------|-------------------|-------------------------------|-------------------|-------------------|
|                 |                   | 2 clusters                    | 3 clusters        | 4 clusters        |
| <b>Variable</b> | Age               | 0.45                          | 0.45              | 0.59              |
|                 | Sex               | 1                             | 0.82              | 0.8               |
|                 | Stage (4 levels)  | 0.56                          | 0.2               | 0.12              |
|                 | Stage 3/4 vs. 1/2 | 0.56                          | 0.16              | 0.21              |
|                 | Stage 4 vs. 1/2/3 | 0.2                           | 0.11              | 0.17              |
|                 | HPV (sequencing)  | <i>6.20E-08</i> *             | <i>1.40E-07</i> * | <i>2.00E-15</i> * |
|                 | HPV (clinical)    | <i>8.40E-07</i> *             | <i>2.80E-06</i> * | <i>5.60E-12</i> * |
|                 | Site              | <i>3.20E-08</i> *             | <i>2.70E-07</i> * | <i>5.00E-09</i> * |

**Supplemental Table 4. PDX cluster associations with patient demographic and tumor variables.**

Correlation of demographic and clinical characteristics of PDXs with cluster membership reveals that HPV status and tumor site are the only variables significantly correlated with hierarchical gene expression-based clustering (when partitioned by either 2, 3, or 4 clusters). Age, sex, and stage were not significantly associated with expression-based clustering in any analyses conducted.
